# Supplementary material for: Silicophosphates containing SiO6octahedra – anhydrous synthesis under ambient conditions
Source: Royal Society of Chemistry journal article supplement (doi:10.1039/c3nj00721a), 2013-11-25
Supplement: c3nj00721a.pdf [file c3nj00721a.pdf]

## Electronic Supplementary Information

### **Silicophosphates containing SiO<sub>6</sub> octahedra - anhydrous synthesis at ambient conditions**

Sandra Jähnigen,<sup>a</sup> Erica Brendler,<sup>b</sup> Uwe Böhme,<sup>a</sup> Gerhard Heide<sup>c</sup> and Edwin Kroke\*<sup>a</sup>

<sup>a</sup> TU Bergakademie Freiberg, Institut für Anorganische Chemie, Leipziger Straße 29, 09596 Freiberg, Germany. Fax: +49 (0)3731 394058; Tel: +49 (0)3731 393174; E-mail: Edwin.Kroke@chemie.tu-freiberg.de

<sup>b</sup> TU Bergakademie Freiberg, Institut für Analytische Chemie, Leipziger Straße 29, 09596 Freiberg, Germany

<sup>c</sup> TU Bergakademie Freiberg, Institut für Mineralogie, Brennhausgasse 14, 09596 Freiberg, Germany

#### Contents:

- Figure S1** <sup>29</sup>Si CP/MAS NMR spectra of **SiPO-3** with different contact times.
- Figure S2** <sup>29</sup>Si SP/MAS NMR spectrum of **SiPO-3**.
- Figure S3** Comparison of <sup>31</sup>P CP/MAS and <sup>31</sup>P MAS NMR spectra of compound **SiPO-3**.
- Figure S4** <sup>1</sup>H NMR spectrum of **SiPO-2**.
- Figure S5** <sup>1</sup>H→<sup>31</sup>P HETCOR NMR spectrum of **SiPO-2**.

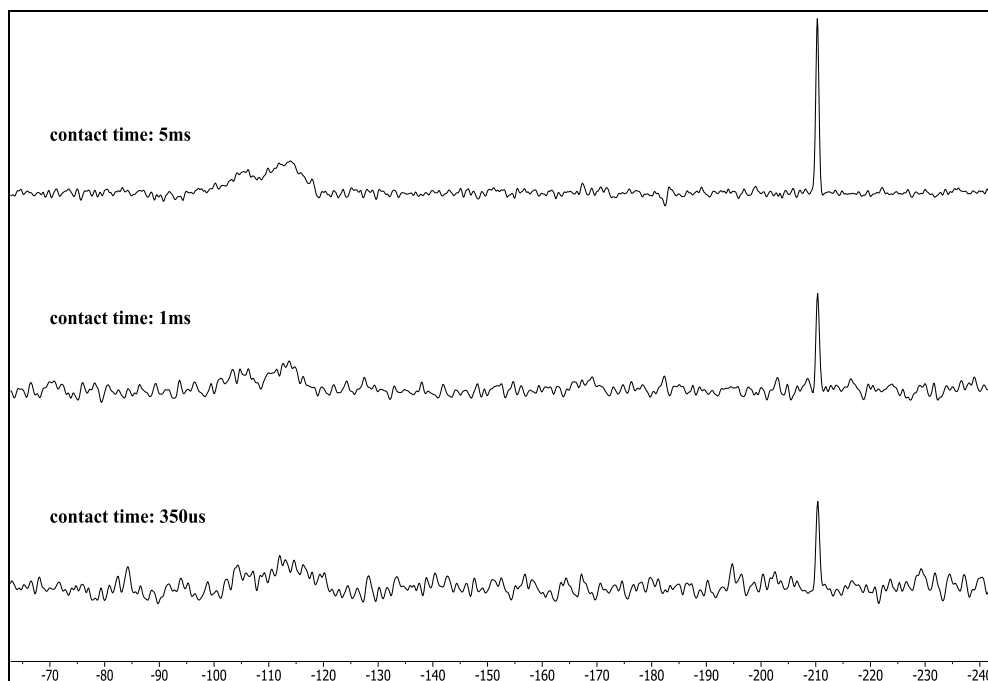

**Fig. S1**  $^{29}\text{Si}$  CP/MAS NMR spectra of **SiPO-3** [ppm] with contact time 350  $\mu\text{s}$ , 1 ms and 5 ms. With increasing contact times signals at  $\delta=-210$  ppm ( $\text{SiO}_6$ ) were amplified compared to the  $\text{SiO}_4$  signals.

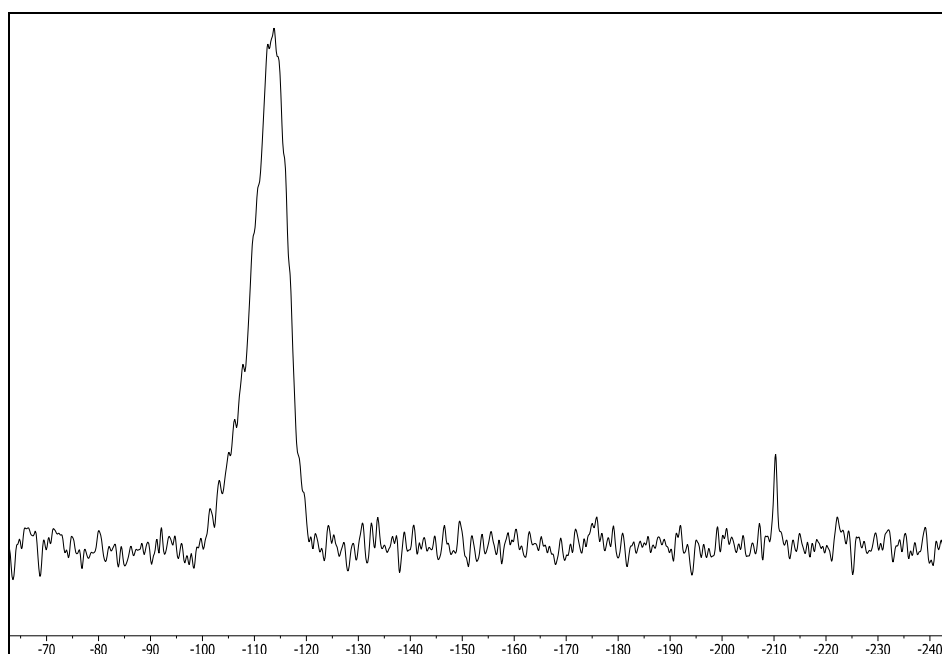

**Fig. S2**  $^{29}\text{Si}$  SP/MAS NMR [ppm] spectrum from a different batch of **SiPO 3**.

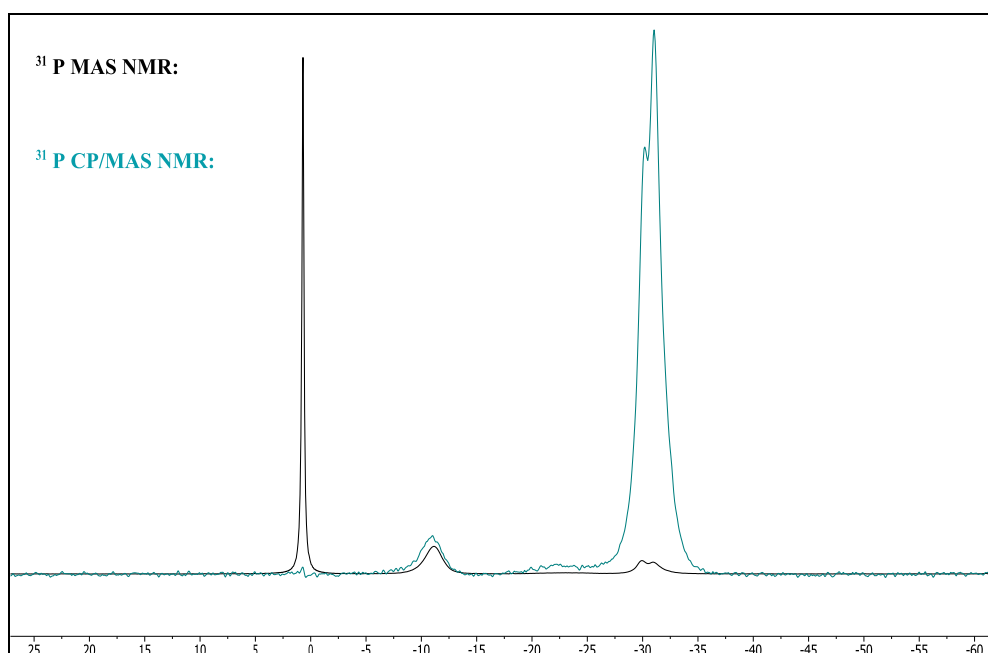

Fig. S3 Comparison of <sup>31</sup>P CP/MAS and <sup>31</sup>P MAS NMR spectra [ppm] of compound SiPO-3.

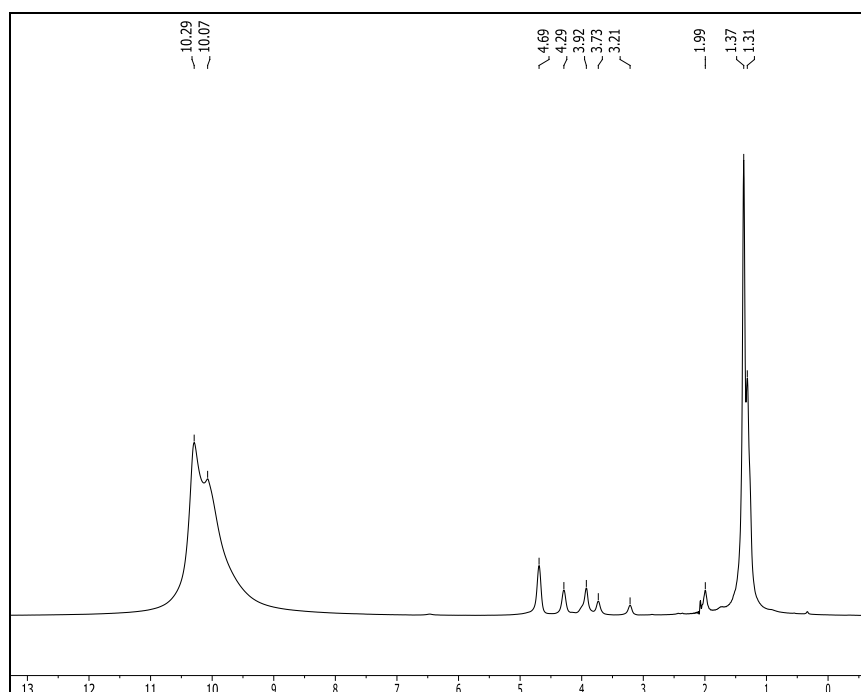

Fig. S4 <sup>1</sup>H MAS NMR spectrum [ppm] of compound SiPO-2 at 14 kHz spinning speed. Signals at 10 ppm can be assigned to remaining OH groups of phosphoric acid, values at 1.3 ppm and around 3.9 ppm represent CH<sub>3</sub> and CH of *i*-propoxy groups and remaining solvent.

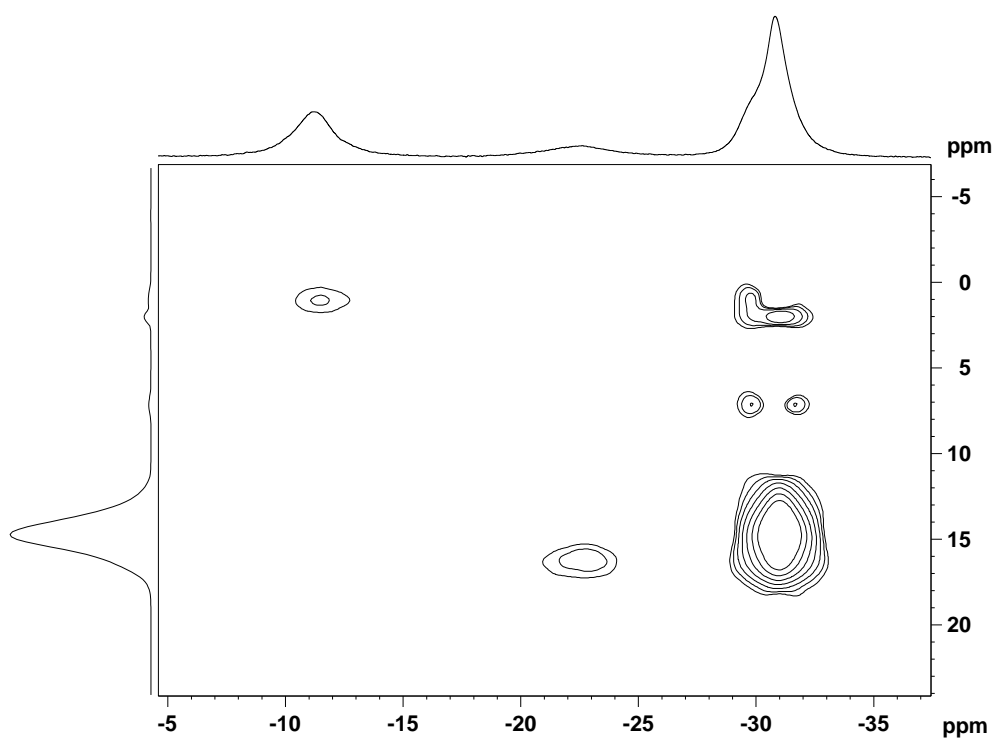

Fig. S5  $^1\text{H} \rightarrow ^{31}\text{P}$  HETCOR NMR spectrum of **SiPO-2** at 14 kHz. At the  $^{31}\text{P}$  axes (horizontal) the  $^{31}\text{P}$  single pulse MAS spectrum is shown.
